# Supplementary material
Source: Springer Nature journal article supplement (https://www.springermedizin.de/resource/supplementary/13256_2010_1544_MOESM4_ESM.pdf/9647900)

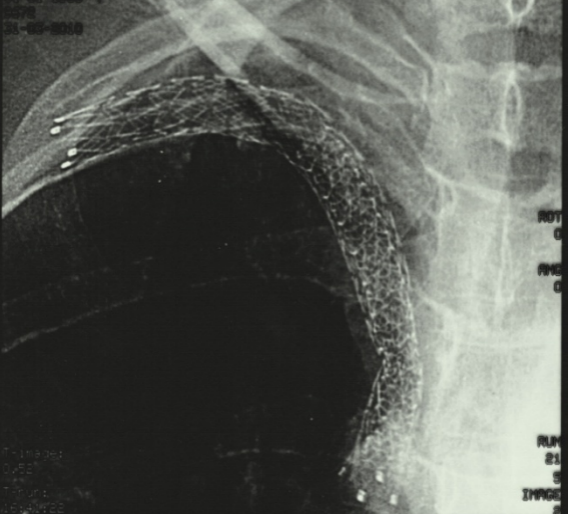

21-05-2010

POT  
C  
PME  
C

RUN  
21  
5  
IMAGE

Supplement: MOESM4 [file 9647900]
